# Supplementary material for: Candidate Therapeutics by Screening for Multitargeting Ligands: Combining the CB2 Receptor With CB1, PPARγ and 5-HT4 Receptors
Source: Front Pharmacol. 2022 Feb 28;13:812745. doi: 10.3389/fphar.2022.812745 (PMC8918518; doi:10.3389/fphar.2022.812745)
Supplement: Supplementary file 2 [file DataSheet2.xlsx]

## Sheet: Supplementary Table S1
Supplementary Table S1: The average Tanimoto coefficient (Tc) values for the active molecules used to construct the different models≠.
Molecular sets	Average Tc	# of active molecules
CB2R agonists	0.38	275
CB2R antagonists	0.37	2437
CB1R agonists	0.43	127
CB1R antagonists	0.45	296
PPARγ agonists	0.52	243
PPARγ antagonists	0.56	168
5-HT4R agonists	0.5	155
5-HT4R antagonists	0.51	148
≠ Fingerprints were calculated by the RDKit toolkit and Tc by the CDK toolkit (KNIME platform v. 4.0.1)

## Sheet: Supplementary Table S2
Supplementary Table S2: Comparing the performance of 2D, 3D and mixed 2D/3D descriptors' models for CB2R agonists≠.
CB2R agonists	MODEL	# Descriptors	# Functional Descriptorsa	# Final Descriptorsb	Top MCC	Mean MCC^	AUC+	EF+	#. Filters
	2D descriptors	186	182	125	0.73	0.7	0.9	17 (54*)	2933
	3D descriptors	117	115	58	0.57	0.5	0.85	7 (13.5*)	2287
	2D+3D descriptors	303	296	130	0.66	0.61	0.88	5 (16*)	3981
a Numbers of descriptors that remain after rejection of descriptors with low or zero variance
b Decriptors remaining after rejection of highly correlated ones. We used r= 0.9 for rejection decision
^ Top 1000 filters
* EF values above an index = 0.7
+AUC and EF were calculated for the test sets from the 5-fold cross-validation
≠ The learning set for comparing the three models consists of 275 active molecules diluted with 30000 random molecules from the ZINC database (Sterling and Irwin, 2015). The table presents the numbers of calculated descriptors used to build each model and the statistic performance: top and mean MCC of the filters, the AUC, and the EF values (Section S1, supplementary data). The last column indica…

## Sheet: Supplementary Table S3
Supplementary Table S3: Average Tanimoto coefficients (Tc) between top candidates in each model ("hits set" from screening for the 6 sets of whihc 5 are multitargeted) and the active molecules that were used to build the different models≠.
		Active molecules set (learning sets)
Hits set	Hits set Tc	CB2R agonists	CB1R agonists	CB1R antagonists	PPARγ agonists	5-HT4R agonists
241260 selective CB2 agonists	0.32	0.33
63735 CB2 agonist/CB1 agonists	0.38	0.36	0.38
324 CB2 agonist/CB1 antagonists	0.45	0.38		0.39
374 CB2 agonist/PPARγ agonists	0.39	0.35			0.37
14008 CB2 agonist/5-HT4 agonists	0.33	0.33				0.34
28 CB2 agonist/PPARγ agonist/5-HT4 agonists	0.4	0.34			0.35	0.34
≠ Fingerprints were calculated by the RDKit toolkit and Tc by the CDK toolkit (KNIME platform v. 4.0.1)

## Sheet: Supplementary Table S4
Supplementary Table S4: ALA scan results for residues involved in ligand interactions at 6KPC and 5ZTY≠
Structure	Ligand	Y25	F87	S90	F91	F94	H95	I110	V113	T114	F117	L182	F183	P184	I186	Y190	L191	W194	W258	V261	L262	M265	F281	S285	H-bonds	Total interactions
6KPC	AM12033	+	+	+	+	+	+		+	+	+	HB	+	+		+	+	+		+		+	+	HB	3	19
	ALA scan (Δ stability)*	29.02	25.42	1.57	22.99	24.65	1.44	24.02	15.91	4.86	13.06	19.96	22.93	12.96	16.74	21.61	26.34	31.35	16.86	10.21	20.93	29.5	22.65	7.69
5ZTY	AM10257		+	+	+	+	+	+	+	+	+		+		+	+		+			+	+		+	-	16
	ALA scan (Δ stability)*	22.4	18.25	1.41	9.24	25.54	6.23	21.88	16.58	4.58	8.99	21.07	23.48	10.5	17.67	25.46	22.26	27.97	17.4	12.65	17.71	27.67	19.24	0.42
≠ The interacting residues are from the PDBsum ligplot maps. (+) indicates the presence of a specific residue in that map. Hydrogen bonds (HB) are colored
* Values in Kcal/mol (calculated by Schrödinger Suit 2019-3)

## Sheet: Supplementary Table S5
Supplementary Table S5: Docking results for different cannabinoid ligands at 6KPC and 5ZTY (CB2R) structures≠, and their experimental binding affinity, Ki (nM)a.
			6KPC			5ZTY			Ki (nM)/CB
Activity	Ligand	SMILES	H-BOND	Total Interactions	Docking Score	H-BOND	Total Interactions	Docking Score	CB1	CB2
Selective CB2 agonists	JWH-015	CCCN1C(=C(C2=CC=CC=C21)C(=O)C3=CC=CC4=CC=CC=C43)C	2	16	-9.668	4	17	-9.004	383	13.8
	HU-308	CCCCCCC(C)(C)C1=CC(=C(C(=C1)OC)[C@H]2C=C([C@@H]3C[C@H]2C3(C)C)CO)OC	Didn't pass			Didn't pass			>10,000	22.7
	GW-405833	CC1=C(C2=C(N1C(=O)C3=C(C(=CC=C3)Cl)Cl)C=CC(=C2)OC)CCN4CCOCC4	1	19	-8.791	2	20	-8.705	4772	3.92
	JWH-133	[H][C@]([C@]3([H])C(C)(C)O2)(CC(C)=CC3)C1=C2C=C(C(C)(C)CCC)C=C1	1	19	-9.742	1	16	-7.194	677	3.4
	PM-226	CCCCCCC(C)(C1=CC(OC)=C2C3=C(C(C)(OC2=C1)C)C=NO3)C	0	17	-7.944	0	15	-10.219	>40,000	12.8
	L-759,633	CCCCCCC(C)(C)C(C=C3OC)=CC2=[C@@]3[C@H]1[C@H]([C@@](C)(C)O2)CC=C(C)C1	3	20	-9.541	0	19	-8.209	15850	20
	L-759,656	CCCCCCC(C)(C)c1cc2c(c(c1)OC)[C@@H]3CC(=C)CC[C@H]3C(O2)(C)C	1	20	-9.685	0	19	-8.627	>20000	57
CB2-Selective Antagonists/Inverse Agonists	SR144528	C[C@]1(C2)[C@H](NC(C3=NN(CC4=CC=C(C)C=C4)C(C5=CC=C(Cl)C(C)=C5)=C3)=O)C(C)(C)[C@@H]2CC1	Didn't pass			0	21	-9.831	>10,000	5.6
	AM-630	C4COCCN4CCn(c1C)c2cc(I)ccc2c1C(=O)c3ccc(OC)cc3	2	17	-7.35	4	16	-7.4	5152	31.2
Selective CB1 agonists	Arachidonyl-2´-chloroethylamide (ACEA)	ClCCNC(=O)CCC\C=C/C\C=C/C\C=C/C\C=C/CCCCC	1	18	-7.289	2	20	-11.044	5.29	>2000
	Arachidonylcyclopropylamide (ACPA)	O=C(NC1CC1)CCC\C=C/C\C=C/C\C=C/C\C=C/CCCCC	1	20	-8.303	0	17	-9.449	2.2	715
	Methanandamide (AM-356)	O=C(N[C@H](C)CO)CCC\C=C/C\C=C/C\C=C/C\C=C/CCCCC	1	20	-8.925	1	21	-9.175	28.3	868
	O-1812	C[C@H](CO)NC(=O)CCC/C=C\C/C=C\C/C=C\C/C=C\C(C)(C)CCCCC#N	Didn't pass			2	19	-9.734	3.4	3870
Selective CB1 antagonists	Rimonabant	O=C(NN1CCCCC1)c4nn(c2ccc(Cl)cc2Cl)c(c3ccc(Cl)cc3)c4C	0	17	-7.022	1	16	-8.344	12.3	13200
	Taranabant	C[C@@H]([C@@H](CC1=CC=C(C=C1)Cl)C2=CC=CC(=C2)C#N)NC(=O)C(C)(C)OC3=NC=C(C=C3)C(F)(F)F	4	22	-9.487	2	18	-8.454	0.27	310
	Otenabant	CCNC1(CCN(CC1)C2=NC=NC3=C2N=C(N3C4=CC=C(C=C4)Cl)C5=CC=CC=C5Cl)C(=O)N	Didn't pass			0	20	-6.913	0.7	7663
	Surinabant	O=C(NN1CCCCC1)c4nn(c2ccc(Cl)cc2Cl)c(c3ccc(Br)cc3)c4CC	0	18	-6.614	2	17	-9.265	3.5	442
	AM-251	O=C(NN1CCCCC1)c4nn(c2ccc(Cl)cc2Cl)c(c3ccc(I)cc3)c4C	0	17	-6.934	0	18	-10.251	7.49	2290
	AM-281	CC1=C(N(N=C1C(=O)NN1CCOCC1)C1=C(Cl)C=C(Cl)C=C1)C1=CC=C(I)C=C1	0	16	-6.76	0	18	-8.955	12	4200
Mixed CB1/CB2 agonists	11-hydroxy-∆8-THC-dimethylheptyl (HU-210)	CCCCCCC(C)(C)C1=CC2=C([C@@H]3CC(=CC[C@H]3C(O2)(C)C)CO)C(=C1)O	4	21	-11.792	1	21	-7.881	0.73	0.524
	CP-55,940	O[C@H]1C[C@@H](C2=CC=C(C(C)(C)CCCCCC)C=C2O)[C@H](CCCO)CC1	5	21	-12.382	1	20	-7.704	5	2.8
	WIN-55,212-2	CC1=C(C2=C3N1[C@@H](COC3=CC=C2)CN4CCOCC4)C(=O)C5=CC=CC6=CC=CC=C65	2	19	-11.682	1	20	-10.194	123	16.2
	Nabilone	O=C3CC[C@@H]1[C@H](c2c(OC1(C)C)cc(cc2O)C(C)(C)CCCCCC)C3	3	19	-9.691	1	19	-9.399	1.84	2.19
≠ The number of hydrogen bonds, total interactions with binding site residues, and docking scores are presented for each docking.
a (An et al., 2020)

## Sheet: Supplementary Table S6
Supplementary Table S6: The interactions between the 19 docked CBRs ligands with 23 binding site residues at the 6KPC structure≠.
Activity	Ligand	Y25	F87	S90	F91	F94	H95	I110	V113	T114	F117	L182	F183	P184	I186	Y190	L191	W194	W258	V261	L262	M265	F281	S285	H-BOND	Total
Selective CB2 agonists	JWH-015	0	2	0	1	1	0	1	1	1	0	0	1	1	0	0	1	1	1	1	0	1	1	2	2	16
	GW-405833	0	1	1	2	1	0	1	1	1	1	0	1	1	1	1	1	1	1	1	0	1	0	1	1	19
	JWH-133	1	1	1	1	1	0	1	1	1	1	1	1	1	0	0	0	1	1	1	0	1	1	2	1	19
	PM-226	1	1	1	1	1	0	1	1	1	1	1	1	1	0	0	0	0	1	1	0	1	1	1	0	17
	L-759-633	0	1	1	2	1	0	1	1	1	1	1	1	1	0	1	1	1	1	1	0	1	2	2	3	20
	L-759-656	1	1	1	1	1	0	1	1	1	1	0	1	1	0	1	1	1	1	1	0	1	1	2	1	20
CB2-Selective Antagonists/Inverse Agonists	AM-630	1	2	1	1	1	0	1	1	1	0	1	1	1	0	0	1	1	0	0	0	1	1	1	2	17
Selective CB1 agonists	Arachidonyl-2-chloroethylamide (ACEA)	1	1	1	1	1	0	1	1	1	0	1	2	1	1	1	1	1	0	0	0	0	1	1	1	18
	Arachidonylcyclopropylamide (ACPA)	1	1	1	1	1	0	1	1	1	1	1	1	1	1	1	1	1	0	0	0	1	1	1	1	20
	Methanandamide (AM-356)	2	1	1	1	1	0	1	1	1	1	1	1	1	0	1	1	1	1	0	0	1	1	1	1	20
Selective CB1 antagonists	Rimonabant	1	1	1	1	1	0	1	1	1	1	1	1	1	0	0	1	1	0	0	0	1	1	1	0	17
	Taranabant	1	2	2	1	1	0	1	1	1	1	2	1	1	1	1	1	1	1	1	0	1	1	2	4	22
	Surinabant	1	1	1	1	1	0	1	1	1	1	1	1	1	0	0	1	1	0	1	0	1	1	1	0	18
	AM-251	1	1	1	1	1	0	1	1	1	1	1	1	1	0	0	1	1	0	0	0	1	1	1	0	17
	AM-281	1	1	1	1	1	0	1	1	1	1	1	1	1	0	0	0	1	0	0	0	1	1	1	0	16
Mixed CB1/CB2 agonists	11-hydroxy-8-THC-dimethylheptyl (HU-210)	1	1	1	2	1	0	1	1	1	1	2	1	1	0	1	1	1	1	1	0	1	1	2	4	21
	CP-55-940	1	1	2	2	1	0	1	1	1	1	2	1	1	1	1	1	1	0	1	0	1	1	2	5	21
	WIN-55-212-2	0	2	1	1	1	0	1	1	1	1	0	1	0	1	1	1	1	2	1	0	1	1	1	2	19
	Nabilone	0	1	1	2	1	0	1	1	1	1	1	1	0	0	1	1	1	1	1	0	1	1	2	3	19
≠0- no intercations, 1- there is an interaction, 2- H-Bond. For each molecule the number of H-bonds and total interactions with the 23 residues are indicated
